# Supplementary material for: Determination of SLES in Personal Care Products by Colloid Titration with Light Reflection Measurements
Source: MDPI journal article supplement (doi:10.3390/molecules26092716), 2021-05-05
Supplement: s1 [file s1]

# Determination of SLES in personal care products by colloid titration with light reflection measurements

Dorota Ziółkowska, Iryna Syrotynska, Alexander Shyichuk and Jan Lamkiewicz

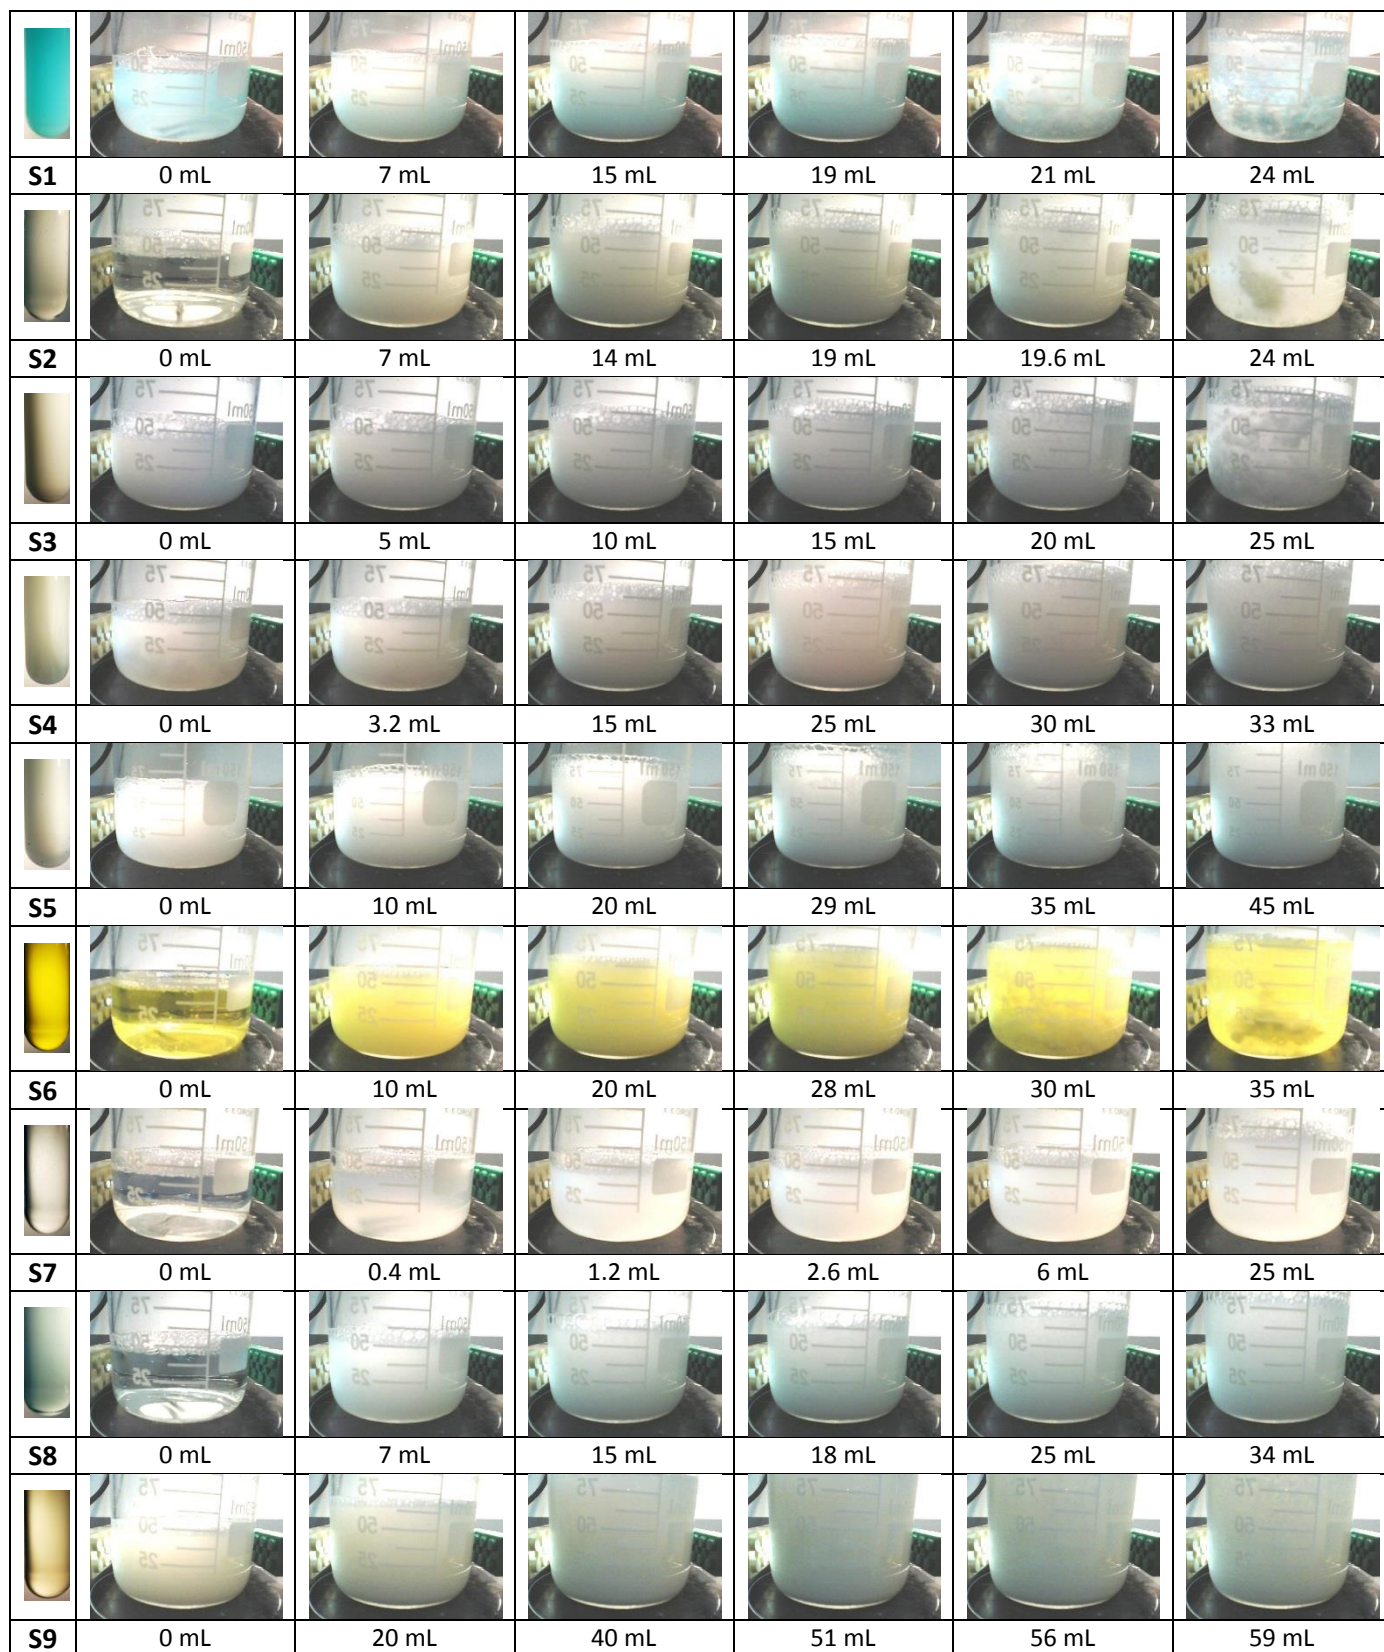

**Figure S1.** Photographs of analysed products as well as product-polyDADMAC mixtures at indicated volumes of polyDADMAC added
